# Supplementary material
Source: Springer Nature journal article supplement (https://www.springermedizin.de/resource/supplementary/13584_2011_4_MOESM1_ESM.pdf/9676834)
Supplement: MOESM1 [file 9676834]

## Asthma

### Treatment

- Use of control medication
- Influenza vaccination

## Cancer Screening

Breast cancer screening

Colon cancer screening

## Cardiovascular Health

### Primary prevention

- Cholesterol
- BMI
- Blood pressure

### Treatment

- Use of LDL modifiers
- Use of ACEI/ARB
- Use of beta blockers

Effectiveness of care - cholesterol control

## Child Health

Anemia screening

## Diabetes

### Treatment

- Blood pressure
- BMI
- Cholesterol
- Eye care
- Glycemic control
- Kidney care
- Immunizations

### Effectiveness of care

- Blood pressure control
- Cholesterol control
- Glycemic control

## Immunizations

Influenza vaccination
